# Supplementary material for: Uncovering New Diversity of Photosynthetic Microorganisms from the Mediterranean Region
Source: MDPI journal article supplement (doi:10.3390/microorganisms10081571), 2022-08-04
Supplement: s1 [file s1]

## **Supplementary material**

# **Uncovering New Diversity of Photosynthetic Microorganisms from the Mediterranean Region**

**Urania Lortou <sup>1</sup>, Emmanuel Panteris <sup>1</sup> and Spyros Gkelis <sup>1,\*</sup>**

<sup>1</sup> Faculty of Sciences, School of Biology, Department of Botany, Aristotle University of Thessaloniki, GR-541 24 Thessaloniki, Greece

\* Correspondence: [sgkelis@bio.auth.gr](mailto:sgkelis@bio.auth.gr); Tel.: +302310-998083

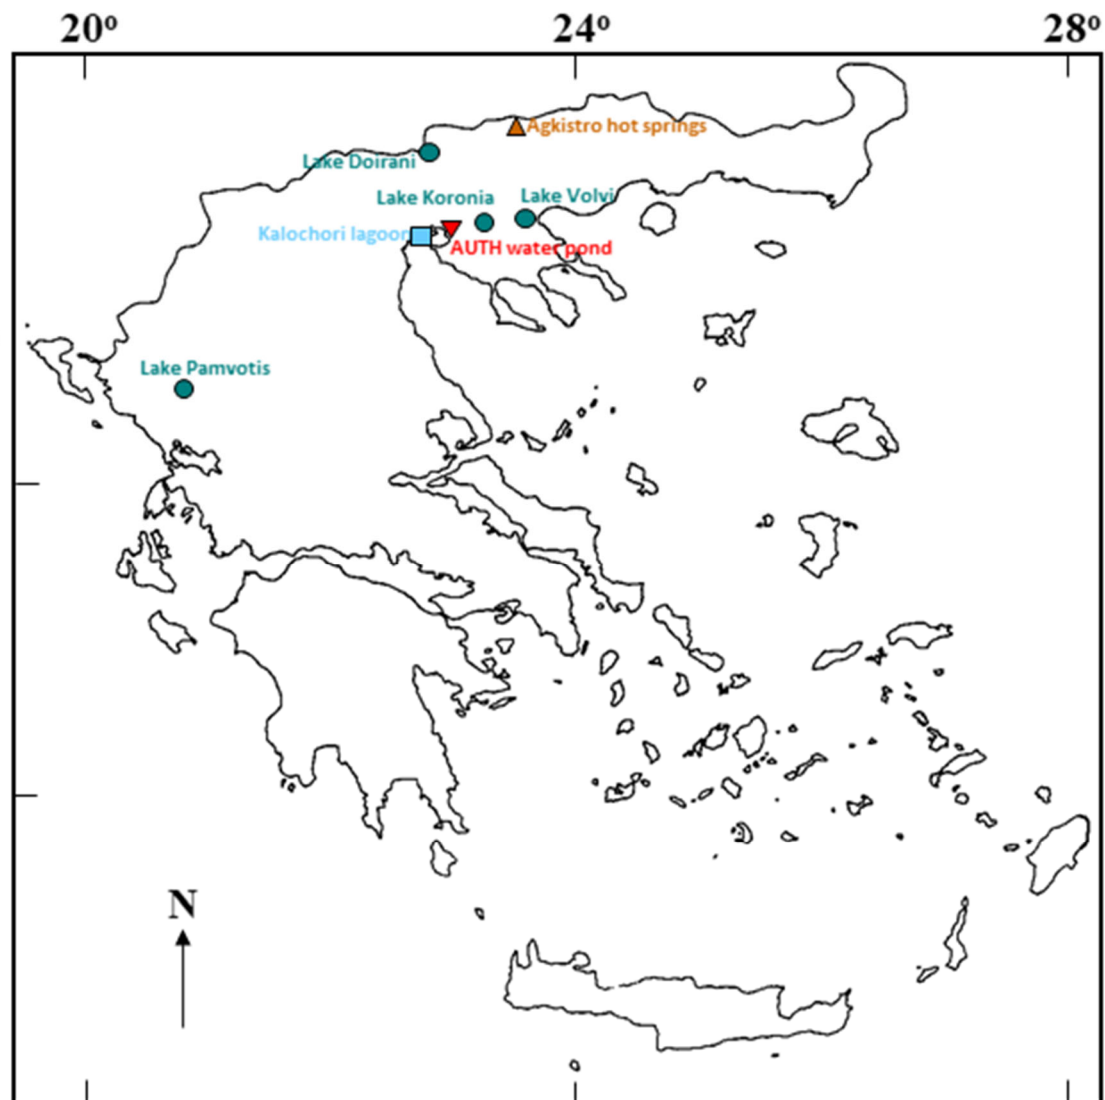

Figure S1: Map of Greece showing the locations of sampling.

Table S1: Set primers and PCR conditions used in the study.

| Primer  | Target gene-region | Sequence (5'–3')           | Reference | PCR Conditions                                                                                                                                                                                                                             |
|---------|--------------------|----------------------------|-----------|--------------------------------------------------------------------------------------------------------------------------------------------------------------------------------------------------------------------------------------------|
| NS1F    | 18S                | GTAGTCATATGCTTGTCTC        | [94]      | initial denaturation step at 95°C for 5 min, followed by 35 cycles consisting of denaturation at 94°C for 30 sec, annealing at 51-54°C for 30 sec and elongation at 72°C for 120 sec; a final 10-min elongation step at 72°C was included. |
| 18L-R   |                    | CACCTACGGAACCTTGTTACGAC TT |           |                                                                                                                                                                                                                                            |
| 18S-F   |                    | AACCTGGTTGATCCTGCCAGT      | [95]      | initial denaturation step at 94°C for 5 min, followed by 32 cycles consisting of denaturation at 94°C for 50 sec, annealing at 53-56°C for 60 sec and elongation at 72°C for 90 sec; a final 10-min elongation step at 72°C was included.  |
| 18S-R   |                    | TGATCCTTCTGCAGGTTACCTACG   |           |                                                                                                                                                                                                                                            |
| chloroF |                    | TGGCCTATCTTGTTGGTCTGT      | [96]      | initial denaturation step at 94°C for 3 min, followed by 35 cycles consisting of denaturation at 94°C for 1 min annealing at 57-60°C for 1 min and elongation at 72°C for 1 min; a final 10-min elongation step at 72°C was included.      |
| chloroR |                    | GAATCAACCTGACAAGGCAAC      |           |                                                                                                                                                                                                                                            |
| NS7m    | ITS                | GGCAATAACAGGTCTGT          | [94]      | initial denaturation step at 94°C for 5 min, followed by 32 cycles consisting of denaturation at 94°C for 50 sec, annealing at 42-45°C for 1 min and elongation at 72°C for 90 sec; a final 10-min elongation step at 72°C was included.   |
| LR1850  |                    | CCTCACGGTACTTGTTTC         |           |                                                                                                                                                                                                                                            |
| 1800F   |                    | ACCTGCGGAAGGATCATTG        |           | initial denaturation step at 94°C for 5 min, followed by 32 cycles consisting of                                                                                                                                                           |

|                  |                                        |      |                                                                                                                                                                                                                                          |
|------------------|----------------------------------------|------|------------------------------------------------------------------------------------------------------------------------------------------------------------------------------------------------------------------------------------------|
| ITS 4R           | TCCTCCGCTTATTGATATGC                   |      | denaturation at 94°C for 50 sec, annealing at 42-45°C for 1 min and elongation at 72°C for 90 sec; a final 10-min elongation step at 72°C was included.                                                                                  |
| ChloroRb<br>cL F | GCNGGTGTWAAAGAYTAYGG                   | [97] | initial denaturation step at 95°C for 3 min, followed by 32 cycles consisting of denaturation at 95°C for 30 sec, annealing at 50-53°C for 1 min and elongation at 72°C for 90 sec; a final 7-min elongation step at 72°C was included.  |
| ChloroRb<br>cL R | TACCACCGWAAGCWACHGGCA                  |      |                                                                                                                                                                                                                                          |
| M28F             | GGTGTGGATTWAAAGCTGGTGT                 | [98] | initial denaturation step at 94°C for 2 min, followed by 30 cycles consisting of denaturation at 94°C for 75 sec, annealing at 54-57°C for 2 min and elongation at 72°C for 120 sec; a final 7-min elongation step at 72°C was included. |
| M1390R           | <i>rbcl</i><br>CTTCCAAAYTTCACAAGCAGCAG |      |                                                                                                                                                                                                                                          |
| rbcl1F           | GCTGGTGTTAAAGATTATCG                   | [99] |                                                                                                                                                                                                                                          |
| rbcl23F          | ATACGTGAATACCACCAGAAGC                 |      | initial denaturation step at 95°C for 10 min, 35 cycles consisting of denaturation at 94°C for 1 min, annealing at 47-53°C for 45 sec and elongation at 72°C for 150 sec; a final 7-min elongation step at 72°C was included.            |
| rbcl8F           | GGTCTTTCAGCTAAAACTACGG                 |      |                                                                                                                                                                                                                                          |
| rbcl4R           | GAAAATGAAACGGTCTCTCC                   |      |                                                                                                                                                                                                                                          |

Table S2: Morphological and morphometric data of TAU-MAC strains

| Strain TAU-MAC | Description                                                                                                                                                                                                                                                                                                                                                                                                                                                                                                                                      | Figure | Taxonomic Assignment              |
|----------------|--------------------------------------------------------------------------------------------------------------------------------------------------------------------------------------------------------------------------------------------------------------------------------------------------------------------------------------------------------------------------------------------------------------------------------------------------------------------------------------------------------------------------------------------------|--------|-----------------------------------|
| 0910, 1010     | Colonial green algae having flat colonies that consist of two or four cells linearly arranged along their long axes. Coenobia four-celled most frequent, but also two-celled and eight-celled were observed. Cell dimensions 8–14 $\mu\text{m}$ long and 3–7 $\mu\text{m}$ wide, one chloroplast with one big pyrenoid covered by starch plates, short subpolar spines and small lateral. Starch and lipid accumulate in age cultures. Under light microscopy ribs and rosettes were observed. Asexual reproduction by aplanosporogenesis.       | 5, 7   | <i>Desmodesmus</i> sp.            |
| 1210           | Solitary cells without mucilage, lunate to sigmoid, narrow or acute at the ends, arched or curved. Rarely, colony formation observed by one end attached in mucilage. Cells dimension 5-28 $\mu\text{m}$ x 1-7 $\mu\text{m}$ . One parietal chloroplast with an embedded pyrenoid naked, without starch cover. Asexual reproduction by autospores.                                                                                                                                                                                               | 6, 7   | <i>Monoraphidium</i> sp.          |
| 3310           | Ellipsoidal to spherical solitary young cells 4–9 $\mu\text{m}$ in diameter. Young cells contain one nucleus, one parietal chloroplast with one big pyrenoid covered with starch envelope. Mature cells ovoid to irregular in shape, >20 $\mu\text{m}$ in dimension, they organized into dyads, tetrads, or packets resulting from desmoschisis. Chloroplast of mature cells is spongy possessing one to five pyrenoids surrounded by a sheath of starch plates. Asexual reproduction is possible by desmoschisis or zoospores and aplanospores. | 6, 8   | <i>Spongiosarcinospis limneus</i> |
| 3510           | Solitary vegetative cells spherical to irregular form, 7–16 $\mu\text{m}$ diameter with the ability to form cell aggregates. Sometimes arranged in colonies of randomly distributed                                                                                                                                                                                                                                                                                                                                                              | 6, 8   | <i>Lilaea pamvotia</i>            |

|      |                                                                                                                                                                                                                                                                                                                                                                                                                                                                                                                                                                                                                                                                                                              |      |                                |
|------|--------------------------------------------------------------------------------------------------------------------------------------------------------------------------------------------------------------------------------------------------------------------------------------------------------------------------------------------------------------------------------------------------------------------------------------------------------------------------------------------------------------------------------------------------------------------------------------------------------------------------------------------------------------------------------------------------------------|------|--------------------------------|
|      | <p>cells. Chloroplast cup-shaped to reticulate with eyespot and one or several pyrenoids surrounded by starch plates. Single nucleus or multiple nuclei directly before reproduction by aplanospores and may zoospores. Starch and plastoglobuli accumulate in chloroplasts and cytoplasmic oil bodies in age cultures. Thylakoids in bundles of different size and thickness. Asexual reproduction by aplanospores and may zoospores.</p>                                                                                                                                                                                                                                                                   |      |                                |
| 0215 | <p>Filaments unbranched and indefinite in length. Cells uninucleate, cylindrical and elongated, closely adherent to one another. Cell diameter increases with the age of a filament from 4 to 10 <math>\mu\text{m}</math> and 7-32 <math>\mu\text{m}</math> long. Chloroplast parietal and band-like, containing more than one pyrenoid. Most of the filaments possess a pointed apical cell at the free end which exhibit a different degree of tapering (acuminate, apiculate or attenuate) and a holdfast for attachment. The morphology of the holdfast ranges from small and colorless to massive and dark brownish-red. Asexual reproduction takes place by aplanosporogenesis or zoosporogenesis.</p> | 6, 7 | <i>Uronema trentonense</i>     |
| 0415 | <p>Cells ovoid and elongated, 5–13 <math>\mu\text{m}</math> long and 3–7 <math>\mu\text{m}</math> wide. Chloroplast with one large pyrenoid. The four-celled coenobia were predominant, followed by two-celled and solitary cells. Lateral spines longer in outer and shorter in inner cells. Asexual reproduction by aplanosporogenesis.</p>                                                                                                                                                                                                                                                                                                                                                                | 5    | <i>Desmodesmus subspicatus</i> |
| 0515 | <p>Solitary vegetative cells spherical to irregular form, 9-18 <math>\mu\text{m}</math> diameter, covered with mucilaginous sheath, with the ability to form cell aggregates. Sometimes arranged in colonies of randomly distributed cells. Chloroplast parietal to reticulate with eyespot and one big pyrenoid surrounded by starch plates. Single nucleus. Starch and lipid droplets (plastoglobuli) accumulate in chloroplasts</p>                                                                                                                                                                                                                                                                       | 6, 8 | <i>Akraea chliaropsychia</i>   |

|                      |                                                                                                                                                                                                                                                                                                                                                                                                                                                                                                                                                                                                    |      |                                    |
|----------------------|----------------------------------------------------------------------------------------------------------------------------------------------------------------------------------------------------------------------------------------------------------------------------------------------------------------------------------------------------------------------------------------------------------------------------------------------------------------------------------------------------------------------------------------------------------------------------------------------------|------|------------------------------------|
|                      | in age cultures. Thylakoids in bundles of different size and thickness. Asexual reproduction by aplanospores and may zoospores.                                                                                                                                                                                                                                                                                                                                                                                                                                                                    |      |                                    |
| 1817<br>2017<br>2617 | Cells spherical to ovoid, non-motile, 3-9 µm in diameter. Simple structure. Mostly solitary, sometimes arranged in colonies of randomly distributed cells. Chloroplast single, cup-shaped or parietal with an embedded big pyrenoid covered by a starch sheath. In old cultures, accumulation of starch plates and lipid droplets in chloroplast and oil bodies in cytoplasm. Thylakoids arranged in bundles of different size and thickness. Propagation by aplanosporogenesis or cell division of mother cell into two daughter cells. No spines, flagella or cell wall ornaments were observed. | 5, 7 | <i>Desmodesmus</i> sp.             |
| 1917<br>2517         | Cells ovoid and elongated, with one or two clearly visible pyrenoids surrounded by a sheath of starch plates. Coenobia two (most frequent), four or eight celled in one row, surrounded by mucilage. Cells had dimensions approximately 5-11 x 3-5 µm. Cells with spines were not observed. Asexual reproduction by division of mother cell into two daughter cells.                                                                                                                                                                                                                               | 5    | <i>Desmodesmus multivariabilis</i> |
| 2117                 | Cells ovoid to ellipsoidal, 3-9 x 2-6 µm. Chloroplast with one clearly visible pyrenoid surrounded by a sheath of starch plates. The single, spineless cells were dominant. The rare four-celled coenobia were always spined usually with three polar and one lateral spine in the outer cells. Reproduction by autospores.                                                                                                                                                                                                                                                                        | 5    | <i>Desmodesmus abundans</i>        |
| 2217                 | Cells ovoid to spheroidal, microscopic, approximate 2-8 µm in diameter. Chloroplast single, cup-shaped or parietal, pyrenoid absent. Young cells ellipsoidal, becoming spherical at maturity. Reproduction by aplanospores, two-four autospores per sporangium.                                                                                                                                                                                                                                                                                                                                    | 6, 7 | <i>Ava limnothalassea</i>          |

|      |                                                                                                                                                                                                                                                                                                                                                                                                                                                                                                                                                                              |       |                                   |
|------|------------------------------------------------------------------------------------------------------------------------------------------------------------------------------------------------------------------------------------------------------------------------------------------------------------------------------------------------------------------------------------------------------------------------------------------------------------------------------------------------------------------------------------------------------------------------------|-------|-----------------------------------|
| 2717 | Cells spherical to ovoid, 3-9 $\mu\text{m}$ in diameter. Rarely, colonies of randomly distributed cells were observed. Chloroplast parietal with one big pyrenoid surrounded by a sheath of starch plates. Asexual reproduction by aplanosporogenesis.                                                                                                                                                                                                                                                                                                                       | 5     | <i>Desmodesmus abundans</i>       |
| 3617 | Cells spherical or oval, microscopic, approximate 2-9 $\mu\text{m}$ in diameter. One lateral cup-shaped or discoid chloroplast, lacking a pyrenoid. Starch grains sometimes observed. Cell wall thin with bristle-like hair in the surface. Propagation by autosporeulation.                                                                                                                                                                                                                                                                                                 | 6, 10 | <i>Nomia picochloropsia</i>       |
| 3917 | Cells non-motile, irregularly spherical to broadly ovoid arranged in coenobia of randomly distributed cells, surrounded by mucilage envelope. Most frequent observed solitary cells. Cells dimensions 5 $\mu\text{m}$ -up to 30 $\mu\text{m}$ and some very big cells up to 40 $\mu\text{m}$ also observed. Chloroplast parietal and net-like in adult cells with one big pyrenoid surrounded by starch. Age cultures accumulate oil bodies and pigments that turn the color of cells from green to orange/ red. Asexual reproduction by autospores organized into coenobia. | 6     | <i>Asterarcys quadricellulare</i> |

Table S3: Similarity of selected Chlorophyta strains from Sphaeropleales based on 18S rRNA gene sequences. TAU-MAC isolates are indicated in bold.

|                         | 1    | 2    | 3    | 4    | 5    | 6    | 7    | 8    | 9    | 10   | 11   | 12   | 13   | 14   | 15   | 16   | 17   | 18   | 19   | 20   | 21   | 22   | 23   | 24   | 25  |
|-------------------------|------|------|------|------|------|------|------|------|------|------|------|------|------|------|------|------|------|------|------|------|------|------|------|------|-----|
| 1. AY846382.1           | 100  |      |      |      |      |      |      |      |      |      |      |      |      |      |      |      |      |      |      |      |      |      |      |      |     |
| <b>2. TAU-MAC 1210</b>  | 99.3 | 100  |      |      |      |      |      |      |      |      |      |      |      |      |      |      |      |      |      |      |      |      |      |      |     |
| 3. AB917098.1           | 98.8 | 99.4 | 100  |      |      |      |      |      |      |      |      |      |      |      |      |      |      |      |      |      |      |      |      |      |     |
| 4. Y16937.1             | 98.9 | 99.3 | 99.8 | 100  |      |      |      |      |      |      |      |      |      |      |      |      |      |      |      |      |      |      |      |      |     |
| 5. KT833577.1           | 98.8 | 99.3 | 99.8 | 99.8 | 100  |      |      |      |      |      |      |      |      |      |      |      |      |      |      |      |      |      |      |      |     |
| 6. JQ315573.1           | 93.5 | 93.2 | 93.3 | 93.3 | 93.3 | 100  |      |      |      |      |      |      |      |      |      |      |      |      |      |      |      |      |      |      |     |
| 7. AY197638.1           | 93.8 | 93.3 | 93.6 | 93.6 | 93.6 | 98.3 | 100  |      |      |      |      |      |      |      |      |      |      |      |      |      |      |      |      |      |     |
| <b>8. TAU-MAC 2617</b>  | 93.6 | 93.2 | 93.4 | 93.4 | 93.4 | 98.1 | 99.5 | 100  |      |      |      |      |      |      |      |      |      |      |      |      |      |      |      |      |     |
| <b>9. TAU-MAC 1817</b>  | 93.8 | 93.3 | 93.6 | 93.5 | 93.6 | 98.1 | 99.4 | 99.6 | 100  |      |      |      |      |      |      |      |      |      |      |      |      |      |      |      |     |
| <b>10. TAU-MAC 2017</b> | 93.7 | 93.3 | 93.5 | 93.5 | 93.5 | 98.1 | 99.5 | 99.9 | 99.7 | 100  |      |      |      |      |      |      |      |      |      |      |      |      |      |      |     |
| 11. AY197627.1          | 94.1 | 93.6 | 93.8 | 93.9 | 93.9 | 98.4 | 99.3 | 99.0 | 98.9 | 98.9 | 100  |      |      |      |      |      |      |      |      |      |      |      |      |      |     |
| 12. AY197634.1          | 94.2 | 93.8 | 93.9 | 93.8 | 93.9 | 98.4 | 99.0 | 98.7 | 98.8 | 98.7 | 99.3 | 100  |      |      |      |      |      |      |      |      |      |      |      |      |     |
| <b>13. TAU-MAC 2717</b> | 93.0 | 92.9 | 92.8 | 92.7 | 92.8 | 98.3 | 98.0 | 97.9 | 97.9 | 98.0 | 98.1 | 97.9 | 100  |      |      |      |      |      |      |      |      |      |      |      |     |
| <b>14. TAU-MAC 0910</b> | 93.4 | 92.8 | 93.0 | 93.1 | 93.1 | 98.8 | 98.2 | 98.0 | 98.1 | 98.0 | 98.4 | 98.3 | 98.2 | 100  |      |      |      |      |      |      |      |      |      |      |     |
| <b>15. TAU-MAC 1010</b> | 93.4 | 92.8 | 93.0 | 93.1 | 93.1 | 98.8 | 98.2 | 98.0 | 98.1 | 98.0 | 98.4 | 98.3 | 98.2 | 100  | 100  |      |      |      |      |      |      |      |      |      |     |
| 16. AB917139.1          | 93.5 | 93.1 | 87.2 | 93.1 | 93.2 | 94.6 | 98.8 | 98.3 | 98.4 | 98.3 | 98.9 | 98.7 | 98.8 | 94.4 | 94.4 | 100  |      |      |      |      |      |      |      |      |     |
| 17. KU175228.1          | 93.6 | 93.1 | 87.2 | 93.3 | 93.4 | 99.2 | 98.6 | 98.3 | 98.4 | 98.4 | 98.6 | 98.6 | 98.5 | 98.9 | 98.9 | 92.8 | 100  |      |      |      |      |      |      |      |     |
| 18. TAU-MAC 1917        | 93.4 | 93.0 | 93.2 | 93.1 | 93.2 | 99.4 | 98.0 | 97.8 | 97.9 | 97.9 | 98.2 | 98.0 | 98.5 | 98.5 | 98.5 | 98.7 | 98.8 | 100  |      |      |      |      |      |      |     |
| 19. TAU-MAC 2517        | 93.4 | 93.0 | 93.2 | 93.1 | 93.2 | 99.4 | 98.0 | 97.8 | 97.9 | 97.9 | 98.2 | 98.0 | 98.5 | 98.5 | 98.5 | 98.7 | 98.8 | 100  | 100  |      |      |      |      |      |     |
| 20. MH683854.1          | 92.6 | 92.3 | 92.3 | 92.3 | 92.3 | 99.1 | 97.5 | 97.6 | 97.3 | 97.3 | 97.7 | 97.5 | 98.3 | 98.2 | 98.2 | 98.2 | 98.6 | 99.8 | 99.8 | 100  |      |      |      |      |     |
| 21. MG022724.1          | 93.8 | 93.5 | 93.6 | 93.5 | 93.6 | 99.0 | 98.5 | 98.3 | 98.4 | 98.4 | 98.6 | 98.5 | 99.5 | 98.8 | 98.8 | 99.2 | 99.2 | 98.7 | 98.7 | 98.7 | 100  |      |      |      |     |
| 22. AB917128.1          | 93.8 | 93.5 | 93.6 | 93.5 | 93.6 | 99.0 | 98.5 | 98.3 | 98.4 | 98.4 | 98.6 | 98.5 | 99.5 | 98.8 | 98.8 | 99.2 | 99.2 | 98.7 | 98.7 | 98.7 | 98.7 | 100  |      |      |     |
| 23. MW471025.1          | 93.8 | 93.5 | 93.6 | 93.5 | 93.6 | 99.0 | 98.5 | 98.3 | 98.4 | 98.4 | 98.6 | 98.5 | 99.5 | 98.8 | 98.8 | 99.2 | 99.2 | 98.7 | 98.7 | 98.7 | 100  | 100  | 100  |      |     |
| 24. EU910612.1          | 93.8 | 93.3 | 93.6 | 93.4 | 93.6 | 99.3 | 98.6 | 98.5 | 98.5 | 98.4 | 98.5 | 98.5 | 98.8 | 98.9 | 98.9 | 99.3 | 99.2 | 99.0 | 99.0 | 98.5 | 99.3 | 99.3 | 99.3 | 100  |     |
| 25. MK764918.1          | 93.5 | 93.0 | 93.2 | 93.1 | 93.2 | 99.1 | 98.5 | 98.3 | 98.3 | 98.3 | 98.8 | 98.4 | 98.6 | 98.9 | 98.9 | 99.4 | 99.1 | 99.0 | 99.0 | 98.6 | 99.3 | 99.3 | 99.3 | 99.4 | 100 |

Table S4: Similarity of selected Chlorophyta strains from Sphaeropleales based on ITS region sequences. TAU-MAC isolates are indicated in bold.

|                         | 1    | 2    | 3    | 4    | 5    | 6    | 7    | 8    | 9    | 10   | 11   | 12   | 13   | 14   | 15   | 16   | 17   | 18   | 19   | 20   | 21   | 22   | 23   | 24  | 25  |
|-------------------------|------|------|------|------|------|------|------|------|------|------|------|------|------|------|------|------|------|------|------|------|------|------|------|-----|-----|
| 1. MH203022.1           | 100  |      |      |      |      |      |      |      |      |      |      |      |      |      |      |      |      |      |      |      |      |      |      |     |     |
| <b>2. TAU-MAC 1210</b>  | 91.9 | 100  |      |      |      |      |      |      |      |      |      |      |      |      |      |      |      |      |      |      |      |      |      |     |     |
| 3. MH010848.1           | 90.7 | 94.6 | 100  |      |      |      |      |      |      |      |      |      |      |      |      |      |      |      |      |      |      |      |      |     |     |
| 4. KT274017.1           | 90.1 | 94.9 | 97.3 | 100  |      |      |      |      |      |      |      |      |      |      |      |      |      |      |      |      |      |      |      |     |     |
| 5. JX456463.1           | 90.4 | 94.4 | 97.2 | 97.3 | 100  |      |      |      |      |      |      |      |      |      |      |      |      |      |      |      |      |      |      |     |     |
| <b>6. TAU-MAC 2717</b>  | 76.1 | 75.7 | 75.7 | 75.7 | 75.0 | 100  |      |      |      |      |      |      |      |      |      |      |      |      |      |      |      |      |      |     |     |
| 7. AB917128.1           | 76.1 | 75.7 | 75.5 | 75.5 | 75.2 | 98.4 | 100  |      |      |      |      |      |      |      |      |      |      |      |      |      |      |      |      |     |     |
| 8. MW471025.1           | 76.1 | 75.7 | 75.5 | 75.5 | 75.2 | 98.4 | 100  | 100  |      |      |      |      |      |      |      |      |      |      |      |      |      |      |      |     |     |
| 9. KT778088.1p          | 76.1 | 75.6 | 75.3 | 75.4 | 75.0 | 98.2 | 99.8 | 99.8 | 100  |      |      |      |      |      |      |      |      |      |      |      |      |      |      |     |     |
| 10. MF357034.1          | 76.7 | 76.3 | 75.4 | 75.3 | 74.7 | 91.9 | 91.4 | 91.4 | 91.2 | 100  |      |      |      |      |      |      |      |      |      |      |      |      |      |     |     |
| 11. DQ417531.1          | 77.2 | 76.6 | 75.4 | 75.8 | 75.3 | 91.5 | 91.4 | 91.4 | 91.2 | 98.9 | 100  |      |      |      |      |      |      |      |      |      |      |      |      |     |     |
| 12. MN738557.1          | 77.0 | 76.4 | 75.7 | 75.7 | 75.0 | 91.5 | 91.3 | 91.3 | 91.1 | 98.9 | 100  | 100  |      |      |      |      |      |      |      |      |      |      |      |     |     |
| <b>13. TAU-MAC 0910</b> | 77.2 | 76.6 | 75.9 | 75.8 | 75.3 | 91.6 | 91.4 | 91.4 | 91.3 | 98.5 | 99.7 | 99.7 | 100  |      |      |      |      |      |      |      |      |      |      |     |     |
| <b>14. TAU-MAC 1010</b> | 77.4 | 76.8 | 76.1 | 76   | 75.5 | 91.8 | 91.6 | 91.6 | 91.4 | 98.6 | 99.8 | 99.8 | 99.9 | 100  |      |      |      |      |      |      |      |      |      |     |     |
| 15. DQ417525.1          | 76.6 | 74.9 | 75.3 | 74.7 | 74.2 | 91.0 | 90.2 | 90.2 | 90.2 | 93.5 | 94   | 93.9 | 94.0 | 94.1 | 100  |      |      |      |      |      |      |      |      |     |     |
| 16. MT603589.1          | 76.2 | 74.6 | 75.0 | 74.5 | 74.0 | 90.9 | 89.9 | 89.9 | 89.9 | 93.5 | 93.8 | 93.8 | 93.5 | 93.6 | 98.9 | 100  |      |      |      |      |      |      |      |     |     |
| <b>17. TAU-MAC 2517</b> | 76.2 | 74.6 | 75.0 | 74.5 | 74.0 | 91.1 | 90.1 | 90.1 | 90.1 | 93.3 | 93.8 | 93.8 | 93.6 | 93.8 | 98.9 | 99.8 | 100  |      |      |      |      |      |      |     |     |
| 18. MH010854.1          | 76.2 | 74.6 | 75.0 | 74.5 | 74.0 | 91.1 | 90.1 | 90.1 | 90.1 | 93.3 | 93.8 | 93.8 | 93.6 | 93.8 | 98.9 | 99.8 | 100  | 100  |      |      |      |      |      |     |     |
| <b>19. TAU-MAC 1917</b> | 76.0 | 74.5 | 74.9 | 74.3 | 73.8 | 90.9 | 89.9 | 89.9 | 89.9 | 93.2 | 93.8 | 93.6 | 93.4 | 93.5 | 98.9 | 99.8 | 99.8 | 99.8 | 100  |      |      |      |      |     |     |
| 20. DQ417556.1          | 76.4 | 75.4 | 75.5 | 76.3 | 74.9 | 79.3 | 79.1 | 79.3 | 79.3 | 80.6 | 80.6 | 80.6 | 80.4 | 80.4 | 80.0 | 80.5 | 80.5 | 80.5 | 80.5 | 100  |      |      |      |     |     |
| 21. DQ417533.1          | 77.9 | 76.7 | 76.9 | 77.3 | 76.9 | 81.5 | 81.3 | 81.3 | 81.3 | 82.0 | 82.1 | 81.7 | 81.8 | 81.8 | 82.1 | 82.1 | 82.1 | 82.1 | 82.3 | 96.7 | 100  |      |      |     |     |
| <b>22. TAU-MAC 1817</b> | 75.2 | 73.5 | 72.9 | 74.1 | 72.8 | 78.5 | 78.3 | 78.3 | 78.3 | 79.2 | 78.5 | 78.5 | 78.8 | 78.8 | 77.6 | 77.8 | 77.6 | 77.4 | 82.8 | 84.0 | 100  | 100  |      |     |     |
| <b>23. TAU-MAC 2017</b> | 75.2 | 73.5 | 72.9 | 74.1 | 72.8 | 78.5 | 78.3 | 78.3 | 78.3 | 79.2 | 78.5 | 78.5 | 78.8 | 78.8 | 77.6 | 77.8 | 77.6 | 77.4 | 82.8 | 84.0 | 100  | 100  | 100  |     |     |
| <b>24. TAU-MAC 2617</b> | 75.2 | 73.5 | 72.9 | 74.1 | 72.8 | 78.5 | 78.3 | 78.3 | 78.3 | 79.2 | 78.5 | 78.5 | 78.8 | 78.8 | 77.6 | 77.8 | 77.6 | 77.6 | 77.4 | 82.8 | 84.0 | 100  | 100  | 100 |     |
| 25. KT445862.2          | 74.9 | 73.8 | 72.9 | 73.7 | 72.1 | 79.0 | 78.7 | 78.7 | 78.7 | 79.7 | 78.9 | 78.8 | 79.0 | 79.0 | 78.5 | 78.5 | 78.5 | 78.5 | 84.1 | 84.4 | 87.9 | 87.9 | 87.9 | 100 | 100 |

Table S5: Similarity of selected Chlorophyta strains from Sphaeropleales based on *rbcL* gene sequences. TAU-MAC isolates are indicated in bold.

|                         | 1    | 2    | 3    | 4    | 5    | 6    | 7    | 8    | 9    | 10   | 11   | 12   | 13   | 14   | 15   | 16   | 17  |
|-------------------------|------|------|------|------|------|------|------|------|------|------|------|------|------|------|------|------|-----|
| 1. MK257133.1           | 100  |      |      |      |      |      |      |      |      |      |      |      |      |      |      |      |     |
| 2. MF278351.1           | 91.5 | 100  |      |      |      |      |      |      |      |      |      |      |      |      |      |      |     |
| <b>3. TAU-MAC 2717</b>  | 91.3 | 94.8 | 100  |      |      |      |      |      |      |      |      |      |      |      |      |      |     |
| 4. KF975604.1           | 90.8 | 91.8 | 92.7 | 100  |      |      |      |      |      |      |      |      |      |      |      |      |     |
| 5. KT777973.1           | 91.2 | 92.2 | 93.7 | 97.4 | 100  |      |      |      |      |      |      |      |      |      |      |      |     |
| 6. KT777963.1           | 91.3 | 92.3 | 93.8 | 97.5 | 99.9 | 100  |      |      |      |      |      |      |      |      |      |      |     |
| <b>7. TAU-MAC 1817</b>  | 90.8 | 91.7 | 93.2 | 96.7 | 98.9 | 99   | 100  |      |      |      |      |      |      |      |      |      |     |
| <b>8. TAU-MAC 2617</b>  | 91.0 | 92.0 | 93.7 | 97.2 | 99.4 | 99.5 | 99.5 | 100  |      |      |      |      |      |      |      |      |     |
| <b>9. TAU-MAC 2017</b>  | 90.7 | 91.8 | 93.4 | 97   | 99.1 | 99.8 | 99.3 | 99.7 | 100  |      |      |      |      |      |      |      |     |
| <b>10. TAU-MAC 2517</b> | 91.0 | 93.9 | 95.1 | 94.1 | 94.5 | 94.6 | 93.8 | 94.2 | 93.3 | 100  |      |      |      |      |      |      |     |
| <b>11. TAU-MAC 1917</b> | 91.1 | 94   | 95.1 | 94.2 | 94.6 | 94.7 | 93.9 | 94.3 | 94.0 | 99.9 | 100  |      |      |      |      |      |     |
| 12. EF012704.1          | 91.6 | 93.9 | 94.8 | 94.1 | 94.9 | 95   | 94.1 | 94.6 | 94.3 | 97.7 | 97.8 | 100  |      |      |      |      |     |
| 13. KF975595.1          | 92.0 | 94   | 95   | 94.8 | 95.3 | 95.5 | 94.6 | 95.1 | 94.8 | 97.2 | 97.3 | 97.7 | 100  |      |      |      |     |
| 14. GU192431.1          | 91.2 | 93.5 | 94.4 | 93.8 | 94.7 | 94.8 | 94   | 94.4 | 94.1 | 97.2 | 97.3 | 98.4 | 98.4 | 100  |      |      |     |
| 15. MK257140.1          | 93.2 | 93.2 | 94   | 93.3 | 93.5 | 93.6 | 92.9 | 93.2 | 92.9 | 94.2 | 95.1 | 95.1 | 95.4 | 94.8 | 100  |      |     |
| <b>16. TAU-MAC 1010</b> | 93.2 | 92.8 | 93.6 | 92.4 | 93.1 | 93.2 | 92.7 | 92.9 | 92.7 | 94.5 | 94.6 | 94.7 | 95.1 | 94.4 | 96.5 | 100  |     |
| <b>17. TAU-MAC 0910</b> | 92.9 | 92.3 | 93.3 | 92.3 | 92.9 | 92.9 | 92.4 | 92.7 | 92.4 | 94.2 | 94.4 | 94.4 | 94.8 | 94.1 | 96.1 | 99.5 | 100 |

Table S6: Similarity of selected Chlorophyta strains from Selenastraceae based on *rbcL* gene sequences. TAU-MAC isolates are indicated in bold.

|                        | 1    | 2    | 3    | 4    | 5    | 6    | 7    | 8    | 9   |
|------------------------|------|------|------|------|------|------|------|------|-----|
| 1. KT355767.1          | 100  |      |      |      |      |      |      |      |     |
| 2. KT355752.1          | 93.5 | 100  |      |      |      |      |      |      |     |
| 3. KT355750.1          | 91.5 | 93.0 | 100  |      |      |      |      |      |     |
| 4. <b>TAU-MAC 1210</b> | 93.0 | 95.0 | 95.5 | 100  |      |      |      |      |     |
| 5. KT355751.1          | 93.7 | 94.2 | 95.2 | 96.1 | 100  |      |      |      |     |
| 6. KT833568.1          | 94.2 | 94.1 | 95.2 | 96.4 | 96.9 | 100  |      |      |     |
| 7. KT833562.1          | 93.8 | 94.7 | 95.3 | 96.1 | 96.1 | 97.3 | 100  |      |     |
| 8. KT833566.1          | 92.9 | 93.9 | 92.9 | 93.0 | 93.4 | 92.7 | 92.5 | 100  |     |
| 9. LC472548.1          | 92.7 | 93.6 | 93.0 | 93.8 | 93.6 | 93.2 | 93.3 | 94.0 | 100 |

Table S7: Similarity of selected Chlorophyta strains from Chaetophorales based on 18S rRNA gene sequences. TAU-MAC isolates are indicated in bold.

|                        | 1    | 2    | 3    | 4    | 5    | 6    | 7    | 8    | 9    | 10  |
|------------------------|------|------|------|------|------|------|------|------|------|-----|
| <b>1. TAU-MAC 0215</b> | 100  |      |      |      |      |      |      |      |      |     |
| 2. KM020161.1          | 100  | 100  |      |      |      |      |      |      |      |     |
| 3. KM020181.1          | 100  | 100  | 100  |      |      |      |      |      |      |     |
| 4. FN824390.1          | 100  | 99.9 | 99.9 | 100  |      |      |      |      |      |     |
| 5. AF182821.1          | 99.9 | 99.9 | 99.9 | 99.9 | 100  |      |      |      |      |     |
| 6. KM020091.1          | 99.8 | 99.8 | 99.8 | 99.8 | 99.8 | 100  |      |      |      |     |
| 7. FN824393.1          | 99.5 | 99.5 | 99.5 | 99.6 | 99.5 | 99.4 | 100  |      |      |     |
| 8. MK250084.1          | 99.5 | 99.5 | 99.5 | 99.5 | 99.5 | 99.5 | 100  | 100  |      |     |
| 9. FN824391.1          | 99.5 | 99.5 | 99.5 | 99.5 | 99.5 | 99.5 | 99.3 | 99.3 | 100  |     |
| 10. MH683840.1         | 99.5 | 99.5 | 99.5 | 99.5 | 99.4 | 99.4 | 99.5 | 99.5 | 99.2 | 100 |

Table S8: Similarity of selected Chlorophyta strains from Chaetophorales based on ITS region sequences. TAU-MAC isolates are indicated in bold.

|                        | 1    | 2    | 3    | 4    | 5   |
|------------------------|------|------|------|------|-----|
| <b>1. TAU-MAC 0215</b> | 100  |      |      |      |     |
| 2. JX092263.1          | 98   | 100  |      |      |     |
| 3. KT308082.2          | 97.8 | 99.5 | 100  |      |     |
| 4. MH683943.1          | 87.3 | 87.8 | 87.9 | 100  |     |
| 5. FR865743.1          | 89.9 | 90.9 | 90.6 | 86.1 | 100 |

Table S9: Similarity of selected Chlorophyta strains from Chlorellales based on 18S rRNA gene sequences. TAU-MAC isolates are indicated in bold.

|                        | 1    | 2    | 3    | 4    | 5    | 6    | 7    | 8    | 9    | 10  |
|------------------------|------|------|------|------|------|------|------|------|------|-----|
| <b>1. TAU-MAC 2217</b> | 100  |      |      |      |      |      |      |      |      |     |
| <b>2. TAU-MAC 3617</b> | 96.6 | 100  |      |      |      |      |      |      |      |     |
| 3. JN086476.1          | 96.5 | 99.8 | 100  |      |      |      |      |      |      |     |
| 4. KF791551.1          | 96.5 | 99.8 | 99.8 | 100  |      |      |      |      |      |     |
| 5. MH683906.1          | 96.6 | 99.9 | 99.9 | 99.9 | 100  |      |      |      |      |     |
| 6. KM020037.1          | 96.2 | 97.3 | 97.2 | 97.2 | 97.3 | 100  |      |      |      |     |
| 7. AY195968.1          | 96.8 | 97.7 | 97.5 | 97.5 | 97.6 | 97.7 | 100  |      |      |     |
| 8. AJ439399.2          | 96.6 | 97.4 | 97.2 | 97.2 | 97.3 | 97.3 | 98.7 | 100  |      |     |
| 9. LN610705.1          | 96.7 | 97.4 | 97.3 | 97.3 | 97.4 | 97.4 | 98.7 | 99.9 | 100  |     |
| 10. KM020039.1         | 96.6 | 97.3 | 97.2 | 97.2 | 97.3 | 97.3 | 98.6 | 99.9 | 99.9 | 100 |

Table S10: Similarity of selected Chlorophyta strains from Chlorellales based on ITS region sequences. TAU-MAC isolates are indicated in bold.

|                        | 1    | 2    | 3    | 4   | 5   | 6   | 7   | 8   |
|------------------------|------|------|------|-----|-----|-----|-----|-----|
| 1. KM020039.1          | 100  |      |      |     |     |     |     |     |
| 2. LN610705.1          | 99.6 | 100  |      |     |     |     |     |     |
| <b>3. TAU-MAC 2217</b> | 80.7 | 81.0 | 100  |     |     |     |     |     |
| 4. KJ676113.1          | 74.4 | 74.8 | 83.2 | 100 |     |     |     |     |
| 5. AB731601.1          | 74.4 | 74.8 | 83.2 | 100 | 100 |     |     |     |
| 6. MK764925.1          | 74.6 | 74.9 | 83.4 | 100 | 100 | 100 |     |     |
| 7. MK643407.1          | 74.6 | 74.9 | 83.4 | 100 | 100 | 100 | 100 |     |
| 8. KP726221.1          | 74.6 | 74.9 | 83.4 | 100 | 100 | 100 | 100 | 100 |

Table S11: Similarity of selected Chlorophyta strains from Chlorellales based on *rbcL* gene sequences. TAU-MAC isolates are indicated in bold.

|                        | 1    | 2    | 3    | 4    | 5    | 6    | 7    | 8    | 9   |
|------------------------|------|------|------|------|------|------|------|------|-----|
| <b>1. TAU-MAC 3617</b> | 100  |      |      |      |      |      |      |      |     |
| 2. KP202854.1          | 99.5 | 100  |      |      |      |      |      |      |     |
| 3. MG552671.1          | 92.4 | 92.4 | 100  |      |      |      |      |      |     |
| <b>4. TAU-MAC 2217</b> | 89.8 | 89.5 | 90.0 | 100  |      |      |      |      |     |
| 5. AB240145.1          | 90.8 | 90.6 | 89   | 90.7 | 100  |      |      |      |     |
| 6. MN128434.1          | 90.9 | 90.6 | 89.4 | 90.5 | 99.1 | 100  |      |      |     |
| 7. MK257138.1          | 90.4 | 90.1 | 91.1 | 91.8 | 91.8 | 91.9 | 100  |      |     |
| 8. KM462888.1          | 90.3 | 90.0 | 91.3 | 90.7 | 90.9 | 90.9 | 93.1 | 100  |     |
| 9. AB383150.1          | 90.8 | 90.6 | 90.6 | 90.5 | 91.1 | 91.1 | 92.8 | 94.1 | 100 |

Table S12: Similarity of selected Chlorophyta strains from Chlamydomonadales based on 18S rRNA gene sequences. TAU-MAC isolates are indicated in bold.

|                         | 1    | 2    | 3    | 4    | 5    | 6    | 7    | 8    | 9    | 10   | 11  |
|-------------------------|------|------|------|------|------|------|------|------|------|------|-----|
| 1. EF159950.1           | 100  |      |      |      |      |      |      |      |      |      |     |
| 2. KF144170.1           | 99.1 | 100  |      |      |      |      |      |      |      |      |     |
| <b>3. TAU-MAC 0515</b>  | 99.2 | 99.9 | 100  |      |      |      |      |      |      |      |     |
| 4. MH651272.1           | 99.2 | 99.9 | 100  | 100  |      |      |      |      |      |      |     |
| 5. KF791539.1           | 96.5 | 96.4 | 96.4 | 96.4 | 100  |      |      |      |      |      |     |
| 6. MF687231.1           | 96.4 | 96.4 | 96.4 | 96.4 | 97.9 | 100  |      |      |      |      |     |
| 7. AY220603.1           | 96.2 | 96.0 | 96.1 | 96.1 | 97.6 | 99.6 | 100  |      |      |      |     |
| <b>8. TAU-MAC 3310</b>  | 96.8 | 97.2 | 97.3 | 97.3 | 98.1 | 99.8 | 99.9 | 100  |      |      |     |
| 9. AY220598.1           | 96.2 | 96.2 | 96.2 | 96.2 | 97.7 | 99.8 | 99.8 | 99.9 | 100  |      |     |
| <b>10. TAU-MAC 3510</b> | 93.7 | 94.1 | 94.1 | 94.1 | 95.0 | 95.3 | 95.2 | 95.3 | 95.3 | 100  |     |
| 11. KF791546.1          | 92.6 | 92.8 | 92.7 | 92.7 | 93.7 | 93.9 | 93.8 | 94.6 | 94   | 96.6 | 100 |

Table S13: Similarity of selected Chlorophyta strains from Chlamydomonadales based on ITS region sequences. TAU-MAC isolates are indicated in bold.

|                         | 1    | 2    | 3    | 4    | 5    | 6    | 7    | 8    | 9    | 10   | 11   | 12  | 13  |
|-------------------------|------|------|------|------|------|------|------|------|------|------|------|-----|-----|
| <b>1. TAU-MAC 3510</b>  | 100  |      |      |      |      |      |      |      |      |      |      |     |     |
| 2. KT308081.2           | 82.5 | 100  |      |      |      |      |      |      |      |      |      |     |     |
| 3. KP406624.1           | 72.1 | 71   | 100  |      |      |      |      |      |      |      |      |     |     |
| <b>4. TAU-MAC 3310</b>  | 71   | 71.7 | 87.6 | 100  |      |      |      |      |      |      |      |     |     |
| 5. MH068690.1           | 66.3 | 68.7 | 87.1 | 93.2 | 100  |      |      |      |      |      |      |     |     |
| 6. MH684014.1           | 71.0 | 72.9 | 69.1 | 73.2 | 69.3 | 100  |      |      |      |      |      |     |     |
| 7. MH651305.1           | 70.3 | 72.1 | 68.4 | 73.9 | 69.3 | 99.7 | 100  |      |      |      |      |     |     |
| 8. MH619608.1           | 72.5 | 73.2 | 72.7 | 73.5 | 70.1 | 77.2 | 76.6 | 100  |      |      |      |     |     |
| 9. KT308086.2           | 74.8 | 74.6 | 76.7 | 76.6 | 75.5 | 78.7 | 78.1 | 80.2 | 100  |      |      |     |     |
| 10. MH651319.1          | 75.6 | 74.2 | 72.7 | 73.3 | 71.8 | 78.8 | 78.2 | 80.4 | 85.5 | 100  |      |     |     |
| <b>11. TAU-MAC 0515</b> | 76.2 | 74.4 | 73.9 | 75.1 | 73.4 | 78.7 | 78.4 | 80.5 | 86.3 | 99.8 | 100  |     |     |
| 12. JQ315797.1          | 77.5 | 75   | 74.2 | 75.1 | 73.6 | 78.8 | 78.3 | 80.4 | 86.5 | 99.7 | 99.8 | 100 |     |
| 13. JQ315798.1          | 77.4 | 76.4 | 74.9 | 76.6 | 74.3 | 79.9 | 79.5 | 81.5 | 84.9 | 99.6 | 99.8 | 100 | 100 |

Table S14: Similarity of selected Chlorophyta strains from Chlamydomonadales based on *rbcl* gene sequences. TAU-MAC isolates are indicated in bold.

|                         | 1    | 2    | 3    | 4    | 5    | 6    | 7    | 8    | 9    | 10   | 11  |
|-------------------------|------|------|------|------|------|------|------|------|------|------|-----|
| 1. KJ635640.1           | 100  |      |      |      |      |      |      |      |      |      |     |
| <b>2. TAU-MAC 3310</b>  | 92.7 | 100  |      |      |      |      |      |      |      |      |     |
| 3. MK257143.1           | 92.6 | 96.3 | 100  |      |      |      |      |      |      |      |     |
| 4. HE860265.1           | 91.7 | 92   | 93   | 100  |      |      |      |      |      |      |     |
| 5. HE860264.1           | 91.8 | 91.9 | 92.6 | 98.4 | 100  |      |      |      |      |      |     |
| <b>6. TAU-MAC 3510</b>  | 92.5 | 91.7 | 92.2 | 93.1 | 93.8 | 100  |      |      |      |      |     |
| 7. JN880462.1           | 91.8 | 91.5 | 92.0 | 92.7 | 93.0 | 94.1 | 100  |      |      |      |     |
| 8. JN880463.1           | 91.7 | 92.0 | 92.2 | 93.5 | 93.7 | 94.2 | 98.2 | 100  |      |      |     |
| 9. JN880465.1           | 91.7 | 91.5 | 92.2 | 92.8 | 93.2 | 93.9 | 98.4 | 98.9 | 100  |      |     |
| <b>10. TAU-MAC 0515</b> | 90.7 | 90.2 | 90.6 | 90.3 | 90.7 | 90.7 | 92.2 | 92.3 | 92.6 | 100  |     |
| 11. EF113426.1          | 91.5 | 91.1 | 91.4 | 91.5 | 92.1 | 92.2 | 92.4 | 92.6 | 93.1 | 93.2 | 100 |
